# Supplementary material
Source: PubMed Central journal article supplement (PMC4190964)
Supplement: rsbl20140562supp1.pdf [file rsbl20140562supp1.pdf]

## Electronic Supplementary Material

DNA metabarcoding and the cytochrome c oxidase subunit I marker: not a perfect match

### (A) Example metabarcoding studies using COI and alternative markers

**Recent examples in which COI is used or promoted as an animal metabarcoding marker:**

- Geller J., Meyer C., Parker M., Hawk H. 2013 Redesign of PCR primers for mitochondrial cytochrome c oxidase subunit I for marine invertebrates and application in all-taxa biotic surveys. *Mol Ecol Resour* **13**(5), 851-861. (doi:10.1111/1755-0998.12138). (COI metabarcoding)
- Gibson J., Shokralla S., Porter T.M., King I., van Konynenburg S., Janzen D.H., Hallwachs W., Hajibabaei M. 2014 Simultaneous assessment of the macrobiome and microbiome in a bulk sample of tropical arthropods through DNA metasytematics. *Proc Natl Acad Sci USA* **111**(22), 8007-8012. (doi:10.1073/pnas.1406468111). (COI metabarcoding; also bacterial 16S and protozoa 18S rRNA)
- Hajibabaei M., Spall J.L., Shokralla S., van Konynenburg S. 2012 Assessing biodiversity of a freshwater benthic macroinvertebrate community through non-destructive environmental barcoding of DNA from preservative ethanol. *BMC Ecol* **12**. (doi:10.1186/1472-6785-12-28). (COI metabarcoding)
- Ji Y., Ashton L., Pedley S.M., Edwards D.P., Tang Y., Nakamura A., Kitching R., Dolman P.M., Woodcock P., Edwards F.A., et al. 2013 Reliable, verifiable and efficient monitoring of biodiversity via metabarcoding. *Ecol Lett* **16**(10), 1245-1257. (doi:10.1111/ele.12162). (COI metabarcoding)
- Leray M., Yang J.Y., Meyer C.P., Mills S.C., Agudelo N., Ranwez V., Boehm J.T., Machida R.J. 2013 A new versatile primer set targeting a short fragment of the mitochondrial COI region for metabarcoding metazoan diversity: application for characterizing coral reef fish gut contents. *Front Zool* **10**, e34. (doi:10.1186/1742-9994-10-34). (COI metabarcoding)
- Liu S., Li Y., Lu J., Su X., Tang M., Zhang R., Zhou L., Zhou C., Yang Q., Ji Y., et al. 2013 SOAPBarcode: revealing arthropod biodiversity through assembly of Illumina shotgun sequences of PCR amplicons. *Methods Ecol Evol* **4**(12), 1142-1150. (doi:10.1111/2041-210X.12120). (COI metabarcoding)
- Meusnier I., Singer G.A.C., Landry J.F., Hickey D.A., Hebert P.D.N., Hajibabaei M. 2008 A universal DNA mini-barcode for biodiversity analysis. *BMC Genomics* **9**. (doi:10.1186/1471-2164-9-214). (COI metabarcoding)
- Tang C.Q., Leasi F., Obertegger U., Kieneke A., Barraclough T.G., Fontaneto D. 2012 The widely used small subunit 18S rDNA molecule greatly underestimates true diversity in biodiversity surveys of the meiofauna. *Proc Natl Acad Sci USA* **109**(40), 16208-16212. (doi:10.1073/pnas.1209160109). (COI metabarcoding)
- Yu D.W., Ji Y., Emerson B.C., Wang X., Ye C., Yang C., Ding Z. 2012 Biodiversity soup: metabarcoding of arthropods for rapid biodiversity assessment and biomonitoring. *Methods Ecol Evol* **3**(4), 613-623. (doi:10.1111/j.2041-210X.2012.00198.x). (COI metabarcoding)

**Diet metabarcoding studies using the COI primers from Zeale *et al.* [1]. These primers (highlighted in Figure 1) were widely adopted after initial results suggested “this primer set is capable of detecting the complete range of arthropod prey in diets”**

- Zeale M.R.K., Butlin R.K., Barker G.L.A., Lees D.C., Jones G. 2011 Taxon-specific PCR for DNA barcoding arthropod prey in bat faeces. *Mol Ecol Resour* **11**(2), 236-244. (doi:10.1111/j.1755-0998.2010.02920.x). (COI primers – development of Zeale *et al.* primers)

- Alberdi A., Garin I., Aizpurua O., Aihartza J. 2012 The Foraging Ecology of the Mountain Long-Eared Bat *Plecotus macrobullaris* Revealed with DNA Mini-Barcodes. *PLoS One* **7**(4), e35692. (doi:10.1371/journal.pone.0035692). (COI - Zeale et al. primers)
- Bohmann K., Monadjem A., Noer C.L., Rasmussen M., Zeale M.R.K., Clare E., Jones G., Willerslev E., Gilbert M.T.P. 2011 Molecular diet analysis of two African free-tailed bats (Molossidae) using high throughput sequencing. *PLoS One* **6**(6), e21441. (doi:10.1371/journal.pone.0021441). (COI - Zeale et al. primers)
- Burgar J.M., Murray D.C., Craig M.D., Haile J., Houston J., Stokes V., Bunce M. 2013 Who's for dinner? High-throughput sequencing reveals bat dietary differentiation in a biodiversity hotspot where prey taxonomy is largely undescribed. *Mol Ecol* **23**(15), 3605–3617. (doi:10.1111/mec.12531). (COI - Zeale et al. primers)
- Clare E.L., Symondson W.O.C., Fenton M.B. 2013 An inordinate fondness for beetles? Variation in seasonal dietary preferences of night-roosting big brown bats (*Eptesicus fuscus*). *Mol Ecol* **23**(15), 3633–3647. (COI - Zeale et al. primers)
- Clare E.L., Symondson W.O.C., Broders H., Fabianek F., Fraser E.E., MacKenzie A., Boughen A., Hamilton R., Willis C.K.R., Martinez-Nuñez F., et al. 2013 The diet of *Myotis lucifugus* across Canada: assessing foraging quality and diet variability. *Mol Ecol* **23**(15), 3618–3632. (doi:10.1111/mec.12542). (COI - Zeale et al. primers)
- Emrich M.A., Clare E.L., Symondson W.O.C., Koenig S.E., Fenton M.B. 2013 Resource partitioning by insectivorous bats in Jamaica. *Mol Ecol* **23**(15), 3648–3656. (doi:10.1111/mec.12504). (COI - Zeale et al. primers)
- Goerlitz H.R., ter Hofstede H.M., Zeale M.R.K., Jones G., Holderied M.W. 2010 An aerial-hawking bat uses stealth echolocation to counter moth hearing. *Curr Biol* **20**(17), 1568-1572. (doi:10.1016/j.cub.2010.07.046). (COI - Zeale et al. primers)
- Gonsalves L., Bicknell B., Law B., Webb C., Monamy V. 2013 Mosquito consumption by insectivorous bats: does size matter? *PLoS One* **8**(10), e77183. (doi:10.1371/journal.pone.0077183). (COI - Zeale et al. primers)
- Hamad I., Delaporte E., Raoult D., Bittar F. 2014 detection of termites and other insects consumed by african great apes using molecular fecal analysis. *Sci Rep* **4**, 4478. (doi:10.1038/srep04478). (COI - Zeale et al. primers)
- Hope P., Bohmann K., Gilbert M.T., Zepeda-Mendoza M., Razgour O., Jones G. 2014 Second generation sequencing and morphological faecal analysis reveal unexpected foraging behaviour by *Myotis nattereri* (Chiroptera, Vespertilionidae) in winter. *Front Zool* **11**(1), 39. (COI - Zeale et al. primers)
- Krüger F., Clare E.L., Greif S., Siemers B.M., Symondson W.O.C., Sommer R.S. 2013 An integrative approach to detect subtle trophic niche differentiation in the sympatric trawling bat species *Myotis dasycneme* and *Myotis daubentonii*. *Mol Ecol* **23**(15), 3657–3671. (doi:10.1111/mec.12512). (COI - Zeale et al. primers)
- Piñol J., San Andrés V., Clare E.L., Mir G., Symondson W.O.C. 2014 A pragmatic approach to the analysis of diets of generalist predators: the use of next-generation sequencing with no blocking probes. *Mol Ecol Resour* **14**(1), 18-26. (doi:10.1111/1755-0998.12156). (COI - Zeale et al. primers)
- Razgour O., Clare E.L., Zeale M.R.K., Hanmer J., Schnell I.B., Rasmussen M., Gilbert T.P., Jones G. 2011 High-throughput sequencing offers insight into mechanisms of resource partitioning in cryptic bat species. *Ecol Evol* **1**(4). (doi:10.1002/ece3.49). (COI - Zeale et al. primers)
- Rolfe A.K., Kurta A., Clemans D.L. 2014 Species-level analysis of diets of two mormoopid bats from Puerto Rico. *J Mammal* **95**(3), 587-596. (doi:10.1644/13-mamm-a-190). (COI - Zeale et al. primers)
- Sedlock J.L., Krüger F., Clare E.L. 2014 Island Bat Diets: Does it Matter More Who You Are or Where You Live? *Mol Ecol* **23**(15), 3684–3694. (doi:10.1111/mec.12732). (COI - Zeale et al. primers)
- Vesterinen E.J., Lilley T., Laine V.N., Wahlberg N. 2013 Next generation sequencing of fecal DNA reveals the dietary diversity of the widespread insectivorous predator Daubenton's bat

(*Myotis daubentonii*) in southwestern Finland. *PLoS One* **8**(11), e82168. (doi:10.1371/journal.pone.0082168). (COI - Zeale *et al.* primers)

### Recent examples where rRNA markers are used or promoted as animal metabarcoding markers:

- Andersen K., Bird K.L., Rasmussen M., Haile J., Breuning-Madsen H., KjÆR K.H., Orlando L., Gilbert M.T.P., Willerslev E. 2012 Meta-barcoding of 'dirt' DNA from soil reflects vertebrate biodiversity. *Mol Ecol* **21**(8), 1966-1979. (doi:10.1111/j.1365-294X.2011.05261.x). (MtDNA 16S metabarcoding)
- Bienert F., De Danieli S., Miquel C., Coissac E., Poillot C., Brun J.-J., Taberlet P. 2012 Tracking earthworm communities from soil DNA. *Mol Ecol* **21**(8), 2017-2030. (doi:10.1111/j.1365-294X.2011.05407.x). (MtDNA 16S metabarcoding)
- Bik H.M., Porazinska D.L., Creer S., Caporaso J.G., Knight R., Thomas W.K. 2012 Sequencing our way towards understanding global eukaryotic biodiversity. *Trends Ecol Evol* **27**(4), 233-243. (doi:10.1016/j.tree.2011.11.010). (Nuclear 18S metabarcoding)
- Chariton A.A., Court L.N., Hartley D.M., Colloff M.J., Hardy C.M. 2010 Ecological assessment of estuarine sediments by pyrosequencing eukaryotic ribosomal DNA. *Front Ecol Environ* **8**(5), 233-238. (doi:10.1890/090115). (Nuclear 18S metabarcoding)
- Clarke L.J., Soubrier J., Weyrich L.S., Cooper A. 2014 Environmental metabarcodes for insects: *in silico* PCR reveals potential for taxonomic bias. *Mol Ecol Resour*, In press. (doi:10.1111/1755-0998.12265). (Comparison of mtDNA 16S and COI)
- Coissac E., Riaz T., Puillandre N. 2012 Bioinformatic challenges for DNA metabarcoding of plants and animals. *Mol Ecol* **21**(8), 1834-1847. (doi:10.1111/j.1365-294X.2012.05550.x). (Comparison of various markers)
- Creer S., Fonseca V.G., Porazinska D.L., Giblin-Davis R.M., Sung W., Power D.M., Packer M., Carvalho G.R., Blaxter M.L., Lamshead P.J.D., et al. 2010 Ultrasequencing of the meiofaunal biosphere: practice, pitfalls and promises. *Mol Ecol* **19**, 4-20. (doi:10.1111/j.1365-294X.2009.04473.x). (Nuclear 18S metabarcoding)
- De Barba M., Miquel C., Boyer F., Mercier C., Rioux D., Coissac E., Taberlet P. 2014 DNA metabarcoding multiplexing and validation of data accuracy for diet assessment: application to omnivorous diet. *Mol Ecol Resour* **14**(2), 306-323. (doi:10.1111/1755-0998.12188). (MtDNA 16S, 12S and plant metabarcoding)
- Deagle B.E., Kirkwood R., Jarman S.N. 2009 Analysis of Australian fur seal diet by pyrosequencing prey DNA in faeces. *Mol Ecol* **18**(9), 2022-2038. (doi:10.1111/j.1365-294X.2009.04158.x). (MtDNA 16S and nuclear 18S, 28S)
- Fonseca V.G., Carvalho G.R., Sung W., Johnson H.F., Power D.M., Neill S.P., Packer M., Blaxter M.L., Lamshead P.J.D., Thomas W.K., et al. 2010 Second-generation environmental sequencing unmasks marine metazoan biodiversity. *Nat Commun* **1**, e98. (doi:10.1038/ncomms1095). (Nuclear 18S metabarcoding)
- Hirai J., Kuriyama M., Ichikawa T., Hidaka K., Tsuda A. 2014 A metagenetic approach for revealing community structure of marine planktonic copepods. *Mol Ecol Resour*, In press. (doi:10.1111/1755-0998.12294). (Nuclear 28S metabarcoding)
- Jarman S.N., McInnes J.C., Faux C., Polanowski A.M., Marthick J., Deagle B.E., Southwell C., Emmerson L. 2013 Adélie penguin population diet monitoring by analysis of food DNA in scats. *PLoS One* **8**(12), e82227. (doi:10.1371/journal.pone.0082227). (Nuclear 18S metabarcoding)
- Murray D.C., Haile J., Dortch J., White N.E., Haouchar D., Bellgard M.I., Allcock R.J., Prideaux G.J., Bunce M. 2013 Scrapheap Challenge: A novel bulk-bone metabarcoding method to investigate ancient DNA in faunal assemblages. *Sci Rep* **3**, 3371. (doi:10.1038/srep03371). (MtDNA 16S, 12S metabarcoding)

- Porazinska D.L., Giblin-Davis R.M., Faller L., Farmerie W., Kanzaki N., Morris K., Powers T.O., Tucker A.E., Sung W., Thomas W.K. 2009 Evaluating high-throughput sequencing as a method for metagenomic analysis of nematode diversity. *Mol Ecol Resour* **9**(6), 1439 - 1450. (doi:10.1111/j.1755-0998.2009.02611.x). (Nuclear 18S metabarcoding)
- Shehzad W., Riaz T., Nawaz M.A., Miquel C., Poillot C., Shah S.A., Pompanon F., Coissac E., Taberlet P. 2012 Carnivore diet analysis based on next-generation sequencing: application to the leopard cat (*Prionailurus bengalensis*) in Pakistan. *Mol Ecol* **21**(8), 1951-1965. (doi:10.1111/j.1365-294X.2011.05424.x). (MtDNA 12S metabarcoding)
- Zhan A., Bailey S.A., Heath D.D., Macisaac H.J. 2014 Performance comparison of genetic markers for high-throughput sequencing-based biodiversity assessment in complex communities. *Mol Ecol Resour*, *In press*. (doi:10.1111/1755-0998.12254). (Comparison of nuclear 18S, mtDNA 16S and COI)

## **(B) Comments on the use of variable primers in metabarcoding**

To encompass variation observed in primer binding regions primer cocktails (a mixture of several distinct primer variants) and/or degenerate primers (those synthesised with some positions having several possible bases) are often used. This is expected to enable the primers to bind to a wider range of templates and allow their amplification. It has been shown to improve the range of species recovered when amplifying DNA from single species templates [e.g. 2, 3]. However, in metabarcoding studies primer mixes have not allowed recovery of all expected species. For example, when Yu *et al.* [4] tested fully degenerate primers for bulk sequencing of COI from mixed arthropod DNA they found between 24% (>2 read threshold) and 36% (>5 read threshold) of the species known to be in their mixtures were not recovered. There are likely a few reasons why using variable primers can be less than ideal. First, the number of primers required to account for variability increases exponentially as the number of variable sites goes up. Geller *et al.* [2] calculated that >3 billion primer sequence permutations would result if they created a fully degenerated consensus of one binding site they targeted in marine invertebrates. This is an extreme case, but the number of primers created when incorporating degenerate sites commonly found in COI alignments quickly climbs into 100's or 1000's of sequences. Even if you incorporate all variation in binding sites, some oligonucleotide primers will be better at annealing to priming sites than others, some will self anneal (i.e. form secondary structure which prevents PCR priming) or will bind with other primers in the mixture. The incorporation of inosine (an artificial base that can bind to all natural DNA bases) has been suggested [2], but we are not aware of this being tested in metabarcoding analysis. The success rate of the [2] marine invertebrate primers using inosine was ~75% in single template PCR and is likely to be lower in a competitive PCR amplification. Inosine also has different thermal stability when bounded to the four natural DNA bases [5] and may not provide unbiased recovery. In summary, there are several potential difficulties in the recovery of all DNA sequences present in mixtures and this includes variation in primer binding between species. For the most robust protocols, we feel that the preferred option is to target markers with less variation in the primer binding sites rather than trying to incorporate variation into primers.

### **(C) Additional Details for Figure 1**

This figure shows a comparison of sequence variability of four markers in representative insects and highlights the variation in associated primers (primers in Table S1a). Variation in the three mitochondrial markers are shown for 40 insects (representing 25 orders) extracted from complete mtDNA sequences present in GenBank; comparable nuclear 18S rRNA (SSU) sequences were also examined (species listed in Table S2 and S3 respectively; sequences available as Electronic Supplementary Data). To visualize information content, and presence/absence of conserved regions, entropy values were calculated for positions across the sequences (calculated in Bioedit [6] using aligned sequences with gaps removed). Schematic of representative primers designed to amplify DNA from a broad range of insects highlight variability in potential primer binding sites. The forward 18S rRNA primer is near the start of most sequences in GenBank and a few base pairs of sequence are missing the 5' regions of some primers (positions coloured white).

The COI primers were developed as arthropod mini-barcodes for use in a bat diet metabarcoding study [1]. Despite considerable variability in targeted taxa they have been used as the single primer set to recover arthropod markers in over a dozen published papers including diet studies on primates, spiders and bats (see list of references above in Electronic Supplementary Material A). The mitochondrial 16S and 12S rRNA genes have been targeted in various metabarcoding studies (see list of references above in Electronic Supplementary Material A) although we are not aware if these specific primers have been used. The primers for nuclear 18S small subunit (nSSU) have been applied in several metabarcoding studies [e.g. 7, 8].

### **(D) Additional Details for Figure 2**

Sequences of PCR primers that amplify regions of two mitochondrial genes were extracted from complete mtDNA sequences from vertebrates (listed in Table S1b; Sequences available as Electronic Supplementary Data). The summary shown in the figure is based on pairwise distances at primer binding sites between taxa for various taxonomic ranks. For example, Family level comparisons include pairwise distances between taxa in different families but in the same Order. Comparisons below class level are based on fish sequences (Actinopterygii; n=135 sequences; Table S4; variability in these primers is shown in Figure S1). Representative Vertebrata were considered between class comparisons (n=20 sequences; Table S5).

**Table S1:** Primers considered in the current paper

(a) Primer sets shown in Figure 1. This includes three mtDNA markers and one from the nuclear genome. In the paper's colour schematic, reverse complement of reverse primers is shown.

| Gene            | Name                       | Sequence (5' - 3')            | Reference    |
|-----------------|----------------------------|-------------------------------|--------------|
| <b>COI</b>      | ZBJ-ArtF1c                 | AGATATTGGAACWTTATATTTTATTTTGG | [1]          |
|                 | ZBJ-ArtR2c                 | WACTAATCAATTWCCAAATCCTCC      | [1]          |
| <b>16s rRNA</b> | LR-J-13017*                | TTACGCTGTTATCCCTAA            | [9]          |
|                 | LR-N-13398*<br>(16Sar-5')† | CACCTGTTAACAAAAACAT           | [9] and [10] |
| <b>12s rRNA</b> | SR-J-14199*                | TACTATGTTACGACTTAT            | [9]          |
|                 | SR-N-14594*                | AACTAGGATTAGATACCC            | [9] and [10] |
| <b>18s rRNA</b> | SSU_FO4                    | GCTTGTCTCAAAGATTAAGCC         | [8]          |
|                 | SSU_R22                    | GCCTGCTGCCTTCCTTGA            | [8]          |

(b) Primer sets analysed in Figure 2 of paper.

| Gene            | Name                       | Sequence (5' - 3')         | Reference     |
|-----------------|----------------------------|----------------------------|---------------|
| <b>COI</b>      | LCO1490                    | GGTCAACAAATCATAAAGATATTGG  | [11]          |
|                 | mICOIntF                   | GGWACWGGWTGAACWGTWTAYCCYCC | [3]           |
|                 | HCO2198                    | TAAACTTCAGGGTGACCAAAAAATCA | [11]          |
| <b>16s rRNA</b> | 16Sar-5'*<br>(LR-N-13398)† | CGCCTGTTTATCAAAAACAT       | [12] and [10] |
|                 | Chord_16S_F*               | CGAGAAGACCCTRTGGAGCT       | [13]          |
|                 | 16Sbr-3'*<br>(LR-J-12887)† | CCGGTCTGAACTCAGATCACGT     | [12] and [10] |

\*Note that the standard sequence direction provided in GenBank for insect mitochondrial rRNA genes is the reverse complement of that for vertebrates. This is because the mtDNA strand which serves as template for transcription of these genes varies between animal groups. It can be confusing when aligning sequences across groups, and also means the "reverse" primer in insects can become a "forward" primer in vertebrates (e.g. LR-N-13398 in figures 1 and 2).

†These are alternative names for primers binding to the same site.

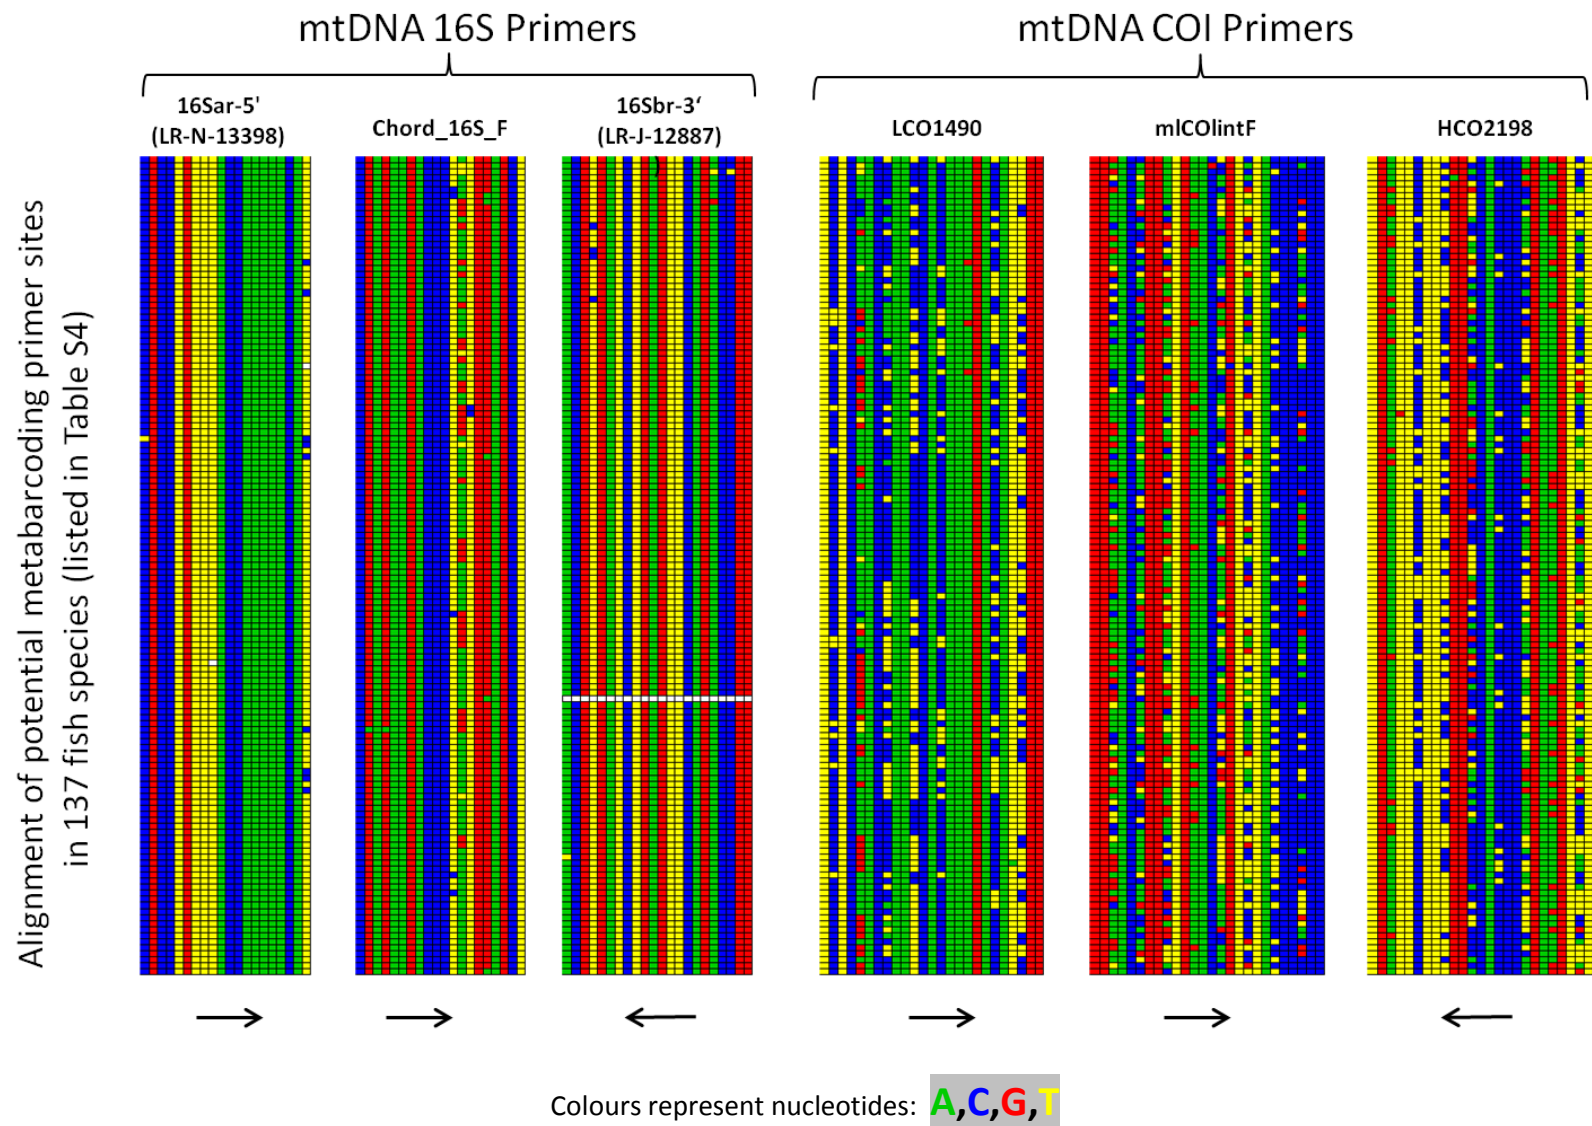

**Figure S1:** Differences in primer binding regions across 135 fish sequences in two mtDNA markers (primers are those used in construction of Figure2).

**Table S2:** List of insects and associated mtDNA sequence reference used for construction of figure 1. Sequences from each of the three regions (COI, 16S and 12S) are available as Electronic Supplementary Data.

| Order                   | Species                           | Common name           | Accession #   |
|-------------------------|-----------------------------------|-----------------------|---------------|
| <b>Odonata</b>          | <i>Pseudolestes mirabilis</i>     | Damselfly             | gi 470229443  |
|                         | <i>Davidius lunatus</i>           | Dragonfly             | gb EU591677.1 |
| <b>Orthoptera</b>       | <i>Locusta migratoria</i>         | Locus                 | gb JN858206.1 |
|                         | <i>Teleogryllus emma</i>          | Field cricket         | gi 219524229  |
| <b>Hemiptera</b>        | <i>Lycorma delicatula</i>         | Plant hopper          | gb EU909203.1 |
|                         | <i>Acyrtosiphon pisum</i>         | Aphid                 | gi 213948225  |
|                         | <i>Nezara viridula</i>            | Stink bug             | gb EF208087.1 |
| <b>Plecoptera</b>       | <i>Dinocras cephalotes</i>        | Stonefly              | gb KF484757.1 |
|                         | <i>Pteronarcys princeps</i>       | Stonefly              | gb AY687866.1 |
| <b>Hymenoptera</b>      | <i>Apis florea</i>                | Honey bee             | gb JX982136.1 |
|                         | <i>Pristomyrmex punctatus</i>     | Ant                   | gi 322422364  |
|                         | <i>Cephus cinctus</i>             | Sawfly                | gb FJ478173.1 |
| <b>Coleoptera</b>       | <i>Trachypachus holmbergi</i>     | Carabid beetle        | gi 208433759  |
|                         | <i>Rhagophthalmus lufengensis</i> | Firefly               | gi 190349565  |
|                         | <i>Tribolium castaneum</i>        | Flour beetle          | gi 133755325  |
| <b>Mecoptera</b>        | <i>Neopanorpa pulchra</i>         | Scorpion fly          | gi 256985280  |
| <b>Diptera</b>          | <i>Anopheles oryzalimnetes</i>    | Mosquito              | gb HQ335345.1 |
|                         | <i>Chironomus tepperi</i>         | Crane fly             | gb JN861749.1 |
|                         | <i>Drosophila melanogaster</i>    | Fruit fly             | gb JQ686694.1 |
| <b>Lepidoptera</b>      | <i>Biston panterinaria</i>        | Moth                  | gi 435855846  |
|                         | <i>Papilio machaon</i>            | Swallowtail Butterfly | gi 391224048  |
|                         | <i>Bombyx mori</i>                | Silkmoth              | gb GU966630.1 |
| <b>Siphonaptera</b>     | <i>Jellisonia amadoi</i>          | Flea                  | gi 556506033  |
| <b>Ephemeroptera</b>    | <i>Ephemera orientalis</i>        | Oriental mayfly       | gi 229324789  |
|                         | <i>Baetis sp.</i>                 | Mayfly                | gb GU936204.1 |
| <b>Blattaria</b>        | <i>Periplaneta Americana</i>      | Cockroach             | gi 378829200  |
|                         | <i>Cryptocercus relictus</i>      | Relic cockroach       | gi 394831453  |
| <b>Isoptera</b>         | <i>Reticulitermes flavipes</i>    | Termite               | gb EF206317.1 |
| <b>Mantodea</b>         | <i>Tamolanica tamolana</i>        | Mantid                | gi 84488776   |
| <b>Dermaptera</b>       | <i>Challia fletcheri</i>          | Earwig                | gi 403531341  |
| <b>Phasmatodea</b>      | <i>Phraortes illepidus</i>        | Walking stick         | gi 313199763  |
| <b>Thysanoptera</b>     | <i>Thrips imaginis</i>            | Thrip                 | gi 25057389   |
| <b>Phthiraptera</b>     | <i>Psococerastis albimaculata</i> | Lice                  | gi 511347991  |
| <b>Megaloptera</b>      | <i>Corydalus cornutus</i>         | Dobson fly            | gb FJ171323.1 |
| <b>Neuroptera</b>       | <i>Chrysopa pallens</i>           | Lace wing             | gi 426406212  |
| <b>Raphidioptera</b>    | <i>Mongoloraphidia harmandi</i>   | Snakeflies            | gi 258649574  |
| <b>Psocoptera</b>       | <i>Psococerastis albimaculata</i> | Barklice              | gi 511347991  |
| <b>Strepsiptera</b>     | <i>Mengenilla moldrzyki</i>       | Twisted wing          | gi 403531501  |
| <b>Mantophasmatodea</b> | <i>Sclerophasma paretisense</i>   | Gladiator             | gi 84488734   |
| <b>Thysanura</b>        | <i>Thermobia domestica</i>        | Silverfish            | gb AY639935.1 |



**Table S3:** List of insects and associated nuclear 18S SSU rRNA sequence references used for construction of figure 1. Sequences are available as Electronic Supplementary Data.

| Order                   | Species                           | Accession #  |
|-------------------------|-----------------------------------|--------------|
| <b>Odonata</b>          | <i>Pseudolestes_mirabilis</i>     | gi 158264680 |
|                         | <i>Davidius_fruhstorferi</i>      | gi 260207002 |
| <b>Orthoptera</b>       | <i>Locusta_migratoria</i>         | gi 15986534  |
|                         | <i>Gryllus_assimilis</i>          | gi 46405911  |
| <b>Hemiptera</b>        | <i>Fulgoridae_sp.</i>             | gi 449084459 |
|                         | <i>Acyrtosiphon_pisum</i>         | gi 886117    |
|                         | <i>Rhaphigaster_nebulosa</i>      | gi 1150554   |
| <b>Plecoptera</b>       | <i>Dinocras_cephalotes</i>        | gi 157417136 |
|                         | <i>Pteronarcys_sachalina</i>      | gi 157417155 |
| <b>Hymenoptera</b>      | <i>Apis_mellifera</i>             | gi 51873301  |
|                         | <i>Proceratium_stictum</i>        | gi 51873307  |
|                         | <i>Cephus_pygmaeus</i>            | gi 300391083 |
| <b>Coleoptera</b>       | <i>Trachypachus_holmbergi</i>     | gi 6578779   |
|                         | <i>Rhagophthalmus_sp.</i>         | gi 68301644  |
|                         | <i>Tribolium_castaneum</i>        | gi 299152224 |
| <b>Mecoptera</b>        | <i>Neopanorpa_sp.</i>             | gi 64483043  |
| <b>Diptera</b>          | <i>Anopheles_gambiae</i>          | gi 103421630 |
|                         | <i>Acricotopus_lucens</i>         | gi 38422424  |
|                         | <i>Drosophila_melanogaster</i>    | gi 425869670 |
| <b>Lepidoptera</b>      | <i>Aglaope_infausta</i>           | gi 110289912 |
|                         | <i>Papilio_troilus</i>            | gi 11095947  |
|                         | <i>Bombyx_mori</i>                | gi 84310305  |
| <b>Siphonaptera</b>     | <i>Monopsyllus_anisus</i>         | gi 83282942  |
| <b>Ephemeroptera</b>    | <i>Ephemera_simulans</i>          | gi 239736518 |
|                         | <i>Baetis_sp.</i>                 | gi 34223577  |
| <b>Blattaria</b>        | <i>Blattidae_sp.</i>              | gi 46405869  |
|                         | <i>Pelmatosilpha_guyanae</i>      | gi 163017888 |
| <b>Isoptera</b>         | <i>Reticulitermes_flavipes</i>    | gi 126678839 |
| <b>Mantodea</b>         | <i>Mantis_religiosa</i>           | gi 126678840 |
| <b>Dermaptera</b>       | <i>Tagalina_sp.</i>               | gi 46405880  |
| <b>Phasmatodea</b>      | <i>Carausius_morosus</i>          | gi 1149618   |
| <b>Thysanoptera</b>     | <i>Sericothrips_staphylinus</i>   | gi 449084537 |
| <b>Phthiraptera</b>     | <i>Pedicinus_badii</i>            | gi 219881925 |
| <b>Megaloptera</b>      | <i>Sialis_hamata</i>              | gi 46405906  |
| <b>Neuroptera</b>       | <i>Kempynus_kimminsi</i>          | gi 219398629 |
| <b>Raphidioptera</b>    | <i>Mongoloraphidia_martynovae</i> | gi 219398632 |
| <b>Psocoptera</b>       | <i>Cerastipsocinae_sp.</i>        | gi 402170151 |
| <b>Mantophasmatodea</b> | <i>Sclerophasma_paresisense</i>   | gi 46405904  |
| <b>Thysanura</b>        | <i>Thermobia_domestica</i>        | gi 15986531  |

**Table S4:** List of fish (Actinopterygii) and associated mtDNA sequence reference used for construction of figure 2 in comparisons below class level. Most sequences were taken from a collection of 100 complete mtDNA sequences [14]. Sequences from additional species with complete mtDNA sequences (shown in bold) were taken from GenBank to increase the number of comparisons at lower taxonomic levels. Sequences from the two regions analysed (COI, 16S) are available as Electronic Supplementary Data.

| Order            | Family            | Genus_species                          | Accession             |
|------------------|-------------------|----------------------------------------|-----------------------|
| Clupeiformes     | Clupeidae         | <i>Sardinops_melanostictus</i>         | AB032554              |
|                  | Clupeidae         | <b><i>Clupea_harengus</i></b>          | <b>gi 148922530</b>   |
|                  | Clupeidae         | <b><i>Clupea_pallasii</i></b>          | <b>gi 148922558</b>   |
|                  | Clupeidae         | <b><i>Sardina_pilchardus</i></b>       | <b>gi 148922544</b>   |
|                  | Clupeidae         | <b><i>Sprattus_sprattus</i></b>        | <b>gi 148922628</b>   |
| Cypriniformes    | Cyprinidae        | <i>Cyprinus_carpio</i>                 | X61010                |
|                  | Cyprinidae        | <b><i>Danio_rerio</i></b>              | <b>gi 15079186</b>    |
|                  | Cobitidae         | <i>Crossostoma_lacustre</i>            | M91245                |
| Salmoniformes    | Salmonidae        | <i>Oncorhynchus_mykiss</i>             | L29771                |
|                  | Salmonidae        | <b><i>Oncorhynchus_nerka</i></b>       | <b>gb EF055889.1 </b> |
|                  | Salmonidae        | <b><i>Oncorhynchus_tshawytscha</i></b> | <b>gi 14647165</b>    |
|                  | Salmonidae        | <b><i>Oncorhynchus_keta</i></b>        | <b>gi 385843132</b>   |
|                  | Salmonidae        | <b><i>Oncorhynchus_masou</i></b>       | <b>gi 120586724</b>   |
|                  | Salmonidae        | <i>Coregonus_lavaretus</i>             | AB034824              |
|                  | Salmonidae        | <b><i>Salmo_salar</i></b>              | <b>gb KF792729.1 </b> |
|                  | Salmonidae        | <b><i>Salmo_trutta</i></b>             | <b>gb JQ390057.1 </b> |
| Stomiiformes     | Gonostomatidae    | <i>Diplophos_sp</i>                    | AB034825              |
|                  | Gonostomatidae    | <i>Sigmops_gracile</i>                 | AB016274              |
|                  | Stomiidae         | <i>Chauliodus_sloani</i>               | AP002915              |
| Ateleopodiformes | Ateleopodidae     | <i>Ateleopus_japonicus</i>             | AP002916              |
|                  | Ateleopodidae     | <i>Ijimaia_dofleini</i>                | AP002917              |
| Aulopiformes     | Aulopodidae       | <i>Aulopus_japonicus</i>               | AB047821              |
|                  | Chlorophthalmidae | <i>Chlorophthalmus_agassizi</i>        | AP002918              |
|                  | Synodontidae      | <i>Harpadon_microchir</i>              | AP002919              |
|                  | Synodontidae      | <i>Saurida_undosquamis</i>             | AP002920              |
| Myctophiformes   | Neoscopelidae     | <i>Neoscopelus_microchir</i>           | AP002921              |
|                  | Myctophidae       | <i>Myctophum_affinec</i>               | AP002922              |
|                  | Myctophidae       | <i>Diaphus_splendidusc</i>             | AP002923              |
| Lampridiformes   | Lamprididae       | <i>Lampris_guttatusc</i>               | AP002924              |
|                  | Trachipteridae    | <i>Trachipterus_trachipterusc</i>      | AP002925              |
|                  | Trachipteridae    | <i>Zu_cristatusc</i>                   | AP002926              |
| Polymixiiformes  | Polymixiidae      | <i>Polymixia_japonica</i>              | AB034826              |
|                  | Polymixiidae      | <i>Polymixia_lowei</i>                 | AP002927              |
| Percopsiformes   | Aphredoderidae    | <i>Aphredoderus_sayanus</i>            | AP004403              |
|                  | Percopsidae       | <i>Percopsis_transmontana</i>          | AP002928              |
| Ophidiiformes    | Carapidae         | <i>Carapus_bermudensis</i>             | AP004404              |
|                  | Ophidiidae        | <i>Bassozetus_zenkevitchi</i>          | AP004405              |
|                  | Ophidiidae        | <i>Lamprogrammus_niger</i>             | AP004410              |
|                  | Ophidiidae        | <i>Sirembo_imberbisc</i>               | AP004406              |

|                      |                                     |                                       |                       |
|----------------------|-------------------------------------|---------------------------------------|-----------------------|
|                      | Bythitidae                          | <i>Cataetyx_rubrirostris</i>          | AP004407              |
|                      | Bythitidae                          | <i>Diplacanthopoma_brachysoma</i>     | AP004408              |
| Gadiformes           | Macrouridae                         | <i>Caelorinchus_kishinouyei</i>       | AP002929              |
|                      | Macrouridae                         | <b><i>Squalogadus_modificatus</i></b> | <b>gi 109689665</b>   |
|                      | Macrouridae                         | <b><i>Trachyrincus_murrayi</i></b>    | <b>gi 109689637</b>   |
|                      | Moridae                             | <i>Physiculus_japonicus</i>           | AP004409              |
|                      | Bregmacerotidae                     | <i>Bregmaceros_nectabanusc</i>        | AP004411              |
|                      | Gadidae                             | <i>Lota_lota</i>                      | AP004412              |
|                      | Gadidae                             | <i>Gadus_morhua</i>                   | X99772                |
|                      | Gadidae                             | <b><i>Gadus_ogac</i></b>              | <b>gi 225622210</b>   |
|                      | Gadidae                             | <b><i>Merlangius_merlangus</i></b>    | <b>gb DQ020496.1 </b> |
|                      | Gadidae                             | <b><i>Pollachius_virens</i></b>       | <b>gi 322422606</b>   |
| Gadidae              | <b><i>Pollachius_pollachius</i></b> | <b>gi 322422647</b>                   |                       |
| Lophiiformes         | Lophiidae                           | <i>Lophius_americanus</i>             | AP004413              |
|                      | Lophiidae                           | <i>Lophius_litulonc</i>               | AP004414              |
|                      | Chaunacidae                         | <i>Chaunax_abei</i>                   | AP004415              |
|                      | Chaunacidae                         | <i>Chaunax_tosaensis</i>              | AP004416              |
|                      | Caulophrynidae                      | <i>Caulophryne_pelagica</i>           | AP004417              |
|                      | Melanocetidae                       | <i>Melanocetus_murrayi</i>            | AP004418              |
| Mugiliformes         | Mugilidae                           | <i>Mugil_cephalus</i>                 | AP002930              |
|                      | Mugilidae                           | <i>Crenimugil_crenilabisc</i>         | NC_017884             |
| Atheriniformes       | Melanotaenidae                      | <i>Melanotaenia_lacustris</i>         | AP004419              |
|                      | Atherinidae                         | <i>Hypoatherina_tsurugae</i>          | AP004420              |
| Beloniformes         | Adrianichthyidae                    | <i>Oryzias_latipes</i>                | AP004421              |
|                      | Scomberesocidae                     | <i>Cololabis_saira</i>                | AP002932              |
|                      | Exocoetidae                         | <i>Exocoetus_volitans</i>             | AP002933              |
| Cyprinodontiformes   | Poeciliidae                         | <i>Gambusia_affinis</i>               | AP004422              |
|                      | Poeciliidae                         | <b><i>Xiphophorus_hellerii</i></b>    | <b>gb FJ226476.1 </b> |
| Stephanoberyciformes | Melamphaidae                        | <i>Scopelogadus_mizolepisc</i>        | AP002934              |
|                      | Melamphaidae                        | <i>Poromitra_oscitansc</i>            | AP002935              |
|                      | Rondeletidae                        | <i>Rondeletia_loricata</i>            | AP002937              |
|                      | Cetomimidae                         | <i>Cetostoma_regani</i>               | AP004423              |
|                      | Cetomimidae                         | <i>Danacetichthys_galathenus</i>      | AP002936              |
|                      | Mirapinnidae                        | <i>Parataeniophorus_sp.</i>           | AP004424              |
| Beryciformes         | Anoplogastridae                     | <i>Anoplogaster_cornuta</i>           | AP004425              |
|                      | Diretmidae                          | <i>Diretmoides_veriginaec</i>         | AP004426              |
|                      | Diretmidae                          | <i>Diretmus_argenteusc</i>            | AP004427              |
|                      | Anomalopidae                        | <i>Anomalops_katoptronc</i>           | AP004428              |
|                      | Monocentridae                       | <i>Monocentris_japonicus</i>          | AP004429              |
|                      | Trachichthyidae                     | <i>Hoplostethus_japonicus</i>         | AP002938              |
|                      | Berycidae                           | <i>Beryx_splendens</i>                | AP002939              |
|                      | Berycidae                           | <i>Beryx_decadactylus</i>             | AP004430              |
|                      | Berycidae                           | <b><i>Beryx_mollis</i></b>            | <b>gi 288904147</b>   |
|                      | Holocentridae                       | <i>Myripristis_berndti</i>            | AP002940              |
|                      | Holocentridae                       | <i>Ostichthys_japonicus</i>           | AP004431              |
|                      | Holocentridae                       | <i>Sargocentron_rubrum</i>            | AP004432              |
| Zeiformes            | Parazenidae                         | <i>Parazen_pacificus</i>              | AP004433              |
|                      | Macrurocyttidae                     | <i>Zenion_japonicum</i>               | AP004434              |
|                      | Zeidae                              | <i>Zeus_faber</i>                     | AP002941              |
|                      | Zeidae                              | <i>Zenopsis_nebulosus</i>             | AP002942              |

|                   |                   |                                         |                               |
|-------------------|-------------------|-----------------------------------------|-------------------------------|
|                   | Oreosomatidae     | <i>Alloctytus_niger</i>                 | AP004435                      |
|                   | Oreosomatidae     | <i>Neocyttus_rhomboidalis</i>           | AP004436                      |
|                   | Caproidae         | <i>Antigonia_capros</i>                 | AP002943                      |
| Gasterosteiformes | Hypoptychidae     | <i>Hypoptychus_dybowskii</i>            | AP004437                      |
|                   | Gasterosteidae    | <i>Gasterosteus_aculeatusc</i>          | AP002944                      |
|                   | Gasterosteidae    | <b><i>Gasterosteus_wheatlandi</i></b>   | <b>gi 212725466</b>           |
|                   | Gasterosteidae    | <b><i>Pungitius_kaibarae</i></b>        | <b>gb EU332749.1 </b>         |
|                   | Gasterosteidae    | <b><i>Pungitius_pungitius</i></b>       | <b>gi 212725480</b>           |
|                   | Gasterosteidae    | <b><i>Culaea_inconstans</i></b>         | <b>gi 212725564</b>           |
|                   | Gasterosteidae    | <b><i>Apeltes_quadracus</i></b>         | <b>gi 212374495</b>           |
|                   | Indostomidae      | <i>Indostomus_paradoxusc</i>            | AP004438                      |
| Synbranchiformes  | Synbranchidae     | <i>Monopterus_albus</i>                 | AP002945                      |
|                   | Synbranchidae     | <i>Synbranchus_marmoratusc</i>          | AP004439                      |
|                   | Mastacembelidae   | <i>Mastacembelus_favus</i>              | AP002946                      |
| Scorpaeniformes   | Dactylopteridae   | <i>Dactyloptena_tiltoni</i>             | AP004440                      |
|                   | Dactylopteridae   | <i>Dactyloptena_peterseni</i>           | AP002948                      |
|                   | Scorpaenidae      | <i>Helicolenus_hilgendorfi</i>          | AP002947                      |
|                   | Triglidae         | <i>Satyrichthys_amiscus</i>             | AP004441                      |
|                   | Cottidae          | <i>Cottus_reinii</i>                    | AP004442                      |
|                   | Cottidae          | <b><i>Cottus_poecilopus</i></b>         | <b>gb EU332750.1 </b>         |
|                   | Cottidae          | <b><i>Cottus_hangiongensis</i></b>      | <b>gb EU332751.1 </b>         |
|                   | Cottidae          | <b><i>Trachidermus_fasciatus</i></b>    | <b>gi 408772194</b>           |
|                   | Cottidae          | <b><i>Clinocottus_analis</i></b>        | <b>gi 288903365</b>           |
|                   | Cyclopteridae     | <i>Aptocyclus_ventricosusc</i>          | AP004443                      |
| Perciformes       | Carangidae        | <i>Carangoides_armatus</i>              | AP004444                      |
|                   | Carangidae        | <i>Caranx_melampygus</i>                | AP004445                      |
|                   | Carangidae        | <b><i>Caranx_ignobilis</i></b>          | <b>gi 560877732</b>           |
|                   | Carangidae        | <b><i>Seriola_dumerili</i></b>          | <b>gi 375267163</b>           |
|                   | Carangidae        | <b><i>Seriola_lalandi</i></b>           | <b>gi 375267149</b>           |
|                   | Carangidae        | <b><i>Trachurus_trachurus</i></b>       | <b>gi 38603494</b>            |
|                   | Emmelichthyidae   | <i>Emmelichthys_struhsakeri</i>         | AP004446                      |
|                   | Lutjanidae        | <i>Pterocaesio_tile</i>                 | AP004447                      |
|                   | Zoarcidae         | <i>Lycodes_toyamensis</i>               | AP004448                      |
|                   | Pholidae          | <i>Enedrias_crassispina</i>             | AP004449                      |
|                   | Blennidae         | <i>Petroscirtes_breviceps</i>           | AP004450                      |
|                   | Blennidae         | <i>Salarias_fasciatus</i>               | AP004451                      |
|                   | Gobiesocidae      | <i>Arcos_sp.</i>                        | AP004452                      |
|                   | Gobiesocidae      | <i>Aspasma_minimac</i>                  | AP004453                      |
|                   | Rhyacichthyidae   | <i>Rhyacichthys_aspro</i>               | AP004454                      |
|                   | Eleotridae        | <i>Eleotris_acanthopoma</i>             | AP004455                      |
|                   | Pleuronectiformes | Paralichthyidae                         | <i>Paralichthys_olivaceus</i> |
| Pleuronectidae    |                   | <i>Platichthys_bicoloratusc</i>         | AP002951                      |
| Pleuronectidae    |                   | <b><i>Hippoglossus_hippoglossus</i></b> | <b>gi 154090893</b>           |
| Pleuronectidae    |                   | <b><i>Colistium_nudipinnis</i></b>      | <b>gi 584593531</b>           |
| Tetraodontiformes | Balistidae        | <i>Sufflamen_fraenatus</i>              | AP004456                      |
|                   | Monacanthidae     | <i>Stephanolepis_cirrhiferc</i>         | AP002952                      |

**Table S5:** Representative Vertebrata species used in figure 2 for comparisons of primer divergence between classes. These are from complete mtDNA sequences in GenBank and two sequence regions were analysed (COI, 16S).

| Class                                    | Genus_species                    | Common name       | Accession     |
|------------------------------------------|----------------------------------|-------------------|---------------|
| Myxini (hagfish)                         | <i>Myxine glutinosa</i>          | Hagfish           | gi 12084808   |
| Hyperoartia (lampreys)                   | <i>Petromyzon marinus</i>        | Lamprey           | gb U11880.1   |
| Sarcopterygii<br>(lobe-finned fish)      | <i>Latimeria chalumnae</i>       | Coelacanth        | gi 121308881  |
|                                          | <i>Protopterus annectens</i>     | Lungfish          | gb JX568887.1 |
| Chondrichthyes<br>(cartilaginous fishes) | <i>Squalus acanthias</i>         | Dogfish shark     | gi 5835708    |
|                                          | <i>Carcharodon carcharias</i>    | Great-white shark | gi 545600999  |
|                                          | <i>Neotrygon kuhlii</i>          | Stingray          | gi 525341128  |
| Osteichthyes<br>(bony fishes)            | <i>Hippoglossus hippoglossus</i> | Halibut           | gi 154090893  |
|                                          | <i>Culaea inconstans</i>         | Stickleback       | gi 212725564  |
|                                          | <i>Salmo trutta</i>              | Trout             | gb JQ390057.1 |
| Amphibia (amphibians)                    | <i>Bombina maxima</i>            | Toad              | gi 194246883  |
|                                          | <i>Ranodon sibiricus</i>         | Salamander        | gi 21450026   |
|                                          | <i>Xenopus laevis</i>            | Frog              | gi 5834981    |
| Reptilia (reptiles)                      | <i>Boa constrictor</i>           | Snake             | gi 74310505   |
|                                          | <i>Phoenicolacerta kulzeri</i>   | Lizard            | gi 215399126  |
|                                          | <i>Crocodylus porosus</i>        | Crocodile         | gi 108802842  |
| Aves (birds)                             | <i>Accipiter gentilis</i>        | Hawk              | gi 219524160  |
|                                          | <i>Alectura lathami</i>          | Turkey            | gi 71658022   |
|                                          | <i>Ambystoma californiense</i>   | Parrot            | gi 62161196   |
| Mammalia (mammals)                       | <i>Rattus rattus</i>             | Rat               | gi 225622213  |
|                                          | <i>Connochaetes gnou</i>         | Wildebeest        | gi 470233679  |
|                                          | <i>Hydrosaurus amboinensis</i>   | Seal              | gi 296940265  |

### Supplementary References

1. Zeale M.R.K., Butlin R.K., Barker G.L.A., Lees D.C., Jones G. 2011 Taxon-specific PCR for DNA barcoding arthropod prey in bat faeces. *Mol Ecol Resour* **11**(2), 236-244. (doi:10.1111/j.1755-0998.2010.02920.x).
2. Geller J., Meyer C., Parker M., Hawk H. 2013 Redesign of PCR primers for mitochondrial cytochrome c oxidase subunit I for marine invertebrates and application in all-taxa biotic surveys. *Mol Ecol Resour* **13**(5), 851-861. (doi:10.1111/1755-0998.12138).
3. Leray M., Yang J.Y., Meyer C.P., Mills S.C., Agudelo N., Ranwez V., Boehm J.T., Machida R.J. 2013 A new versatile primer set targeting a short fragment of the mitochondrial COI region for metabarcoding metazoan diversity: application for characterizing coral reef fish gut contents. *Front Zool* **10**, e34. (doi:10.1186/1742-9994-10-34).
4. Yu D.W., Ji Y., Emerson B.C., Wang X., Ye C., Yang C., Ding Z. 2012 Biodiversity soup: metabarcoding of arthropods for rapid biodiversity assessment and biomonitoring. *Methods Ecol Evol* **3**(4), 613-623. (doi:10.1111/j.2041-210X.2012.00198.x).
5. Martin F.H., Castro M.M., Aboul-ela F., Tinoco I. 1985 Base pairing involving deoxyinosine: implications for probe design. *Nucleic Acids Res* **13**(24), 8927-8938. (doi:10.1093/nar/13.24.8927).
6. Hall T.A. 1999 BioEdit: a user-friendly biological sequence alignment editor and analysis program for Windows 95/98/NT. *Nucl Acids Symp Ser* **41**, 95-98.
7. Creer S., Fonseca V.G., Porazinska D.L., Giblin-Davis R.M., Sung W., Power D.M., Packer M., Carvalho G.R., Blaxter M.L., Lamshead P.J.D., et al. 2010 Ultrasequencing of the meiofaunal biosphere: practice, pitfalls and promises. *Mol Ecol* **19**, 4-20. (doi:10.1111/j.1365-294X.2009.04473.x).
8. Fonseca V.G., Carvalho G.R., Sung W., Johnson H.F., Power D.M., Neill S.P., Packer M., Blaxter M.L., Lamshead P.J.D., Thomas W.K., et al. 2010 Second-generation environmental sequencing unmasking marine metazoan biodiversity. *Nat Commun* **1**. (doi:9810.1038/ncomms1095).
9. Kambhampati S., Smith P.T. 1995 PCR primers for the amplification of four insect mitochondrial gene fragments. *Insect Mol Biol* **4**(4), 233-236. (doi:10.1111/j.1365-2583.1995.tb00028.x).
10. Simon C., Frati F., Beckenback A., Crespi B., Liu H., Flook P. 1994 Evolution, weighting, and phylogenetic utility of mitochondrial gene sequences and a compilation of conserved PCR primers. *Annals Entomol Soc Am* **87**, 651-701.
11. Folmer O., Black M., Hoeh W., Lutz R., Vrijenhoek R. 1994 DNA primers for amplification of mitochondrial cytochrome c oxidase subunit I from diverse metazoan invertebrates. *Mol Mar Biol Biotechnol* **3**(5), 294-299.
12. Palumbi S.R. 1996 Nucleic Acids II: The Polymerase Chain Reaction. In *Molecular Systematics* (ed. D. Hillis C.M., and B. Mable), pp. 205-247. Sunderland, Sinauer.
13. Deagle B.E., Kirkwood R., Jarman S.N. 2009 Analysis of Australian fur seal diet by pyrosequencing prey DNA in faeces. *Mol Ecol* **18**(9), 2022-2038. (doi:10.1111/j.1365-294X.2009.04158.x).
14. Miya M., Takeshima H., Endo H., Ishiguro N.B., Inoue J.G., Mukai T., Satoh T.P., Yamaguchi M., Kawaguchi A., Mabuchi K., et al. 2003 Major patterns of higher teleostean phylogenies: a new perspective based on 100 complete mitochondrial DNA sequences. *Mol Phylogenet Evol* **26**(1), 121-138. (doi:10.1016/S1055-7903(02)00332-9).
